# Supplementary material
Source: HighWire-hosted journal article supplement (http://thorax.bmjjournals.com/highwire/filestream/174085/field_highwire_adjunct_files/0/633228webonlyapp.pdf)
Supplement: 633228webonlyapp.pdf [file 633228webonlyapp.pdf]

## **Autoantibodies in Lung Cancer – possibilities for early detection and subsequent cure.**

### **Supplementary data**

#### **Autoantibody panel 1/7 sensitivity in lung cancer by age**

Number and percentage positivity (% +ve) with 95 % confidence interval (95% CI) in each patient group using Panel1/7. All LC: all lung cancer samples tested.

| <b>Age group</b> |                | <b>All LC</b> |
|------------------|----------------|---------------|
| <b>36-50</b>     | number +ve     | 9/15          |
|                  | % +ve (95% CI) | 60 (32,84)    |
| <b>50-59</b>     | number +ve     | 20/23         |
|                  | % +ve (95% CI) | 87 (66,97)    |
| <b>60-69</b>     | number +ve     | 24/33         |
|                  | % +ve (95% CI) | 73 (54,87)    |
| <b>70-82</b>     | number +ve     | 26/33         |
|                  | % +ve (95% CI) | 79 (61,91)    |
| <b>All LC</b>    |                |               |
| number +ve       |                | 79/104        |
| % +ve (95% CI)   |                | 76 (67,84)    |

#### **Autoantibody panel 1/7 sensitivity in lung cancer by gender**

Number and percentage positivity (% +ve) with 95 % confidence interval (95% CI) in each patient group using Panel1/7. All LC: all lung cancer samples where information on gender was available.

| Group  |                | All LC      |
|--------|----------------|-------------|
| male   | number +ve     | 59/72       |
|        | % +ve (95% CI) | 82 (71, 90) |
| female | number +ve     | 20/31       |
|        | % +ve (95% CI) | 65 (45, 81) |

### Frequency of autoantibodies to CAGE and GBU 4-5 in breast cancer

Number and percentage positivity (% +ve) with 95 % confidence interval (95% CI) in each patient group. Positivity was defined as a value greater than the mean of the normal population plus 2SD. PBC: Primary invasive breast cancer sera.

Normal: matched female sera from individuals discharged as normal following mammographic screening.

(Sample details in Chapman C, Murray A, Chakrabarti J, et al. Autoantibodies in Breast Cancer: their use as an aid to early diagnosis. *Annals of Oncology* 18: 868-73, 2007)

| Group  |               |    | Number and percentage positive |           |
|--------|---------------|----|--------------------------------|-----------|
| Total  |               |    | CAGE                           | GBU 4-5   |
| PBC    | n             | 51 | 3                              | 3         |
|        | %+ve (95% CI) |    | 6 (1, 16)                      | 4 (0, 13) |
| Normal | n             | 31 | 1                              | 2         |
|        | %+ve (95% CI) |    | 3 (0, 17)                      | 6 (1, 21) |
